# Supplementary material
Source: ML conference proceedings conference paper supplement (https://www.ecva.net/papers/eccv_2022/papers_ECCV/html/136850566_ECCV_2022_paper.php)
Supplement: Supplementary file 1 [file 136850566-supp.pdf]

## 1 Proof of Theorem 2

*Proof.* First we make some notations. Suppose we have a grid of size  $(q, q)$ . For a position  $(x, y)$  that  $1 \leq x, y \leq q$ , denote  $UL(x, y)$  to be the generalized window with size  $(q/2 + p_n, q/2 + p_n)$  whose upper left corner lies on  $(x, y)$ , and  $L(y)$  to be the set of generalized windows with size  $(q/2 + p_n, q/2 + p_n)$  whose left side lies on  $y$ . For a generalized window  $M$ , denote  $L(M), R(M), U(M), Lo(M)$  to be the position of left, right, upper and lower side respectively.

Considering two generalized windows  $M_1, M_2$  with size  $(p_n, p_n)$  on the  $q \times q$  grid. Without loss of generality, we assume  $L(M_1) \leq L(M_2)$ . Also we assume  $U(M_1) \leq U(M_2)$ , otherwise we can rotate the grid, and find the generalized window on the rotated grid that corresponds to the one on origin grid. Now we consider different cases.

1. If  $x_2 - x_1 \leq q/2, y_2 - y_1 \leq q/2$ , obviously  $UL(x_1, y_1)$  satisfies.
2. If  $x_2 - x_1 \leq q/2, y_2 - y_1 > q/2$ , we have  $\forall M \in L(y_2), R(M) \geq y_1 + p_n$ . So we only need to find  $x$  such that  $Lo(UL(x, y_2)) \geq \max\{x_1 + p_n, x_2 + p_n\}$ . Actually  $x = x_1$  is enough, so choose the generalized window to be  $UL(x_1, y_2)$ .
3. If  $x_2 - x_1 > q/2, y_2 - y_1 \leq q/2$ , similarly, we can choose  $UL(x_2, y_1)$ .
4. If  $x_2 - x_1 > q/2, y_2 - y_1 > q/2$ , choose  $UL(x_2, y_2)$ .

Hence such generalized window exists for all cases.
